# Supplementary material
Source: publisher site journal article supplement (https://www.dovepress.com/article/188364)
Supplement: Supplementary file 1 [file get_supplementary_file.php]

Supplementary materials

Figure S1 The effects of HJC0152 in HGC-27 cells.


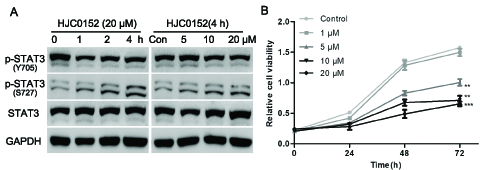


**Notes:** (**A**)The effect of HJC0152 on the phosphorylation of STAT3 in HGC-27 cells. (**B**) Viability of HGC-27 cells treated with different concentrations of HJC0152 (0, 1, 5, 10 and 20μM) for 0, 24, 48, and 72 h was determined by CCK8 assay. ***P*< 0.01, ****P*< 0.001 vs control.

Figure S2 Quality control and quantitative analysis of RNA sequencing data.

–
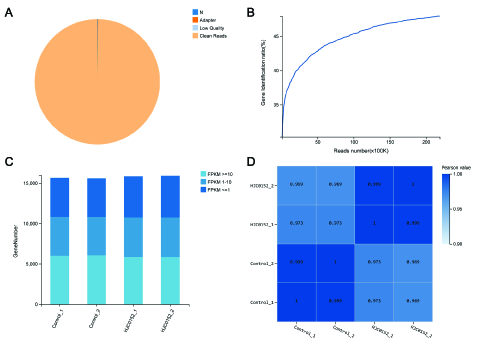


**Notes:** (**A**) Representative quality control statistics of raw reads (sample Control_1). (**B**) Representative sequencing saturation analysis (Control_1). X-axis shows the number of clean reads, Y-axis shows the ratio of identified genes to total genes in reference database. (**C**) Bar graph showing number of identified genes in each sample. (**D**) Heatmap showing correlation coefficient values across samples.
